# Supplementary material for: An efficient Co–N–C oxygen reduction catalyst with highly dispersed Co sites derived from a ZnCo bimetallic zeolitic imidazolate framework
Source: Royal Society of Chemistry journal article supplement (doi:10.1039/c6ra04771h), 2016-01-01
Supplement: c6ra04771h1.pdf [file c6ra04771h1.pdf]

## An efficient Co-N-C oxygen reduction catalyst with highly dispersed Co sites derived from a ZnCo bimetallic zeolitic imidazolate framework

Xiaojuan Wang, Xinxin Fan, Honghong Lin, He Fu, Teng Wang, Jie Zheng\*, Xingguo Li\*

Beijing National Laboratory for Molecular Sciences (BNLMS), The State Key Laboratory of Rare Earth Materials Chemistry and Applications, College of Chemistry and Molecular Engineering, Peking University, Beijing 100871, China

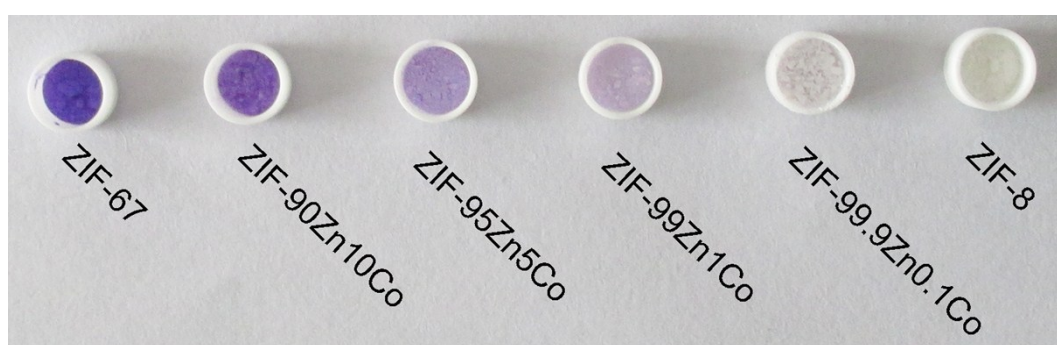

Figure S1 Photos of the ZIF-(100-x)Zn<sub>x</sub>Co samples.

Table S1 The molar ratio Co/(Co+Zn) of ZIF-(100-x)Zn<sub>x</sub>Co (0<x<100) calculated from ICP or starting materials.

| Sample          | Co/(Co+Zn) % |                    |
|-----------------|--------------|--------------------|
|                 | ICP          | Starting materials |
| ZIF-90Zn10Co    | 10.7         | 10                 |
| ZIF-95Zn5Co     | 5.05         | 5                  |
| ZIF-99Zn1Co     | 1.08         | 1                  |
| ZIF-99.9Zn0.1Co | 0.08         | 0.1                |

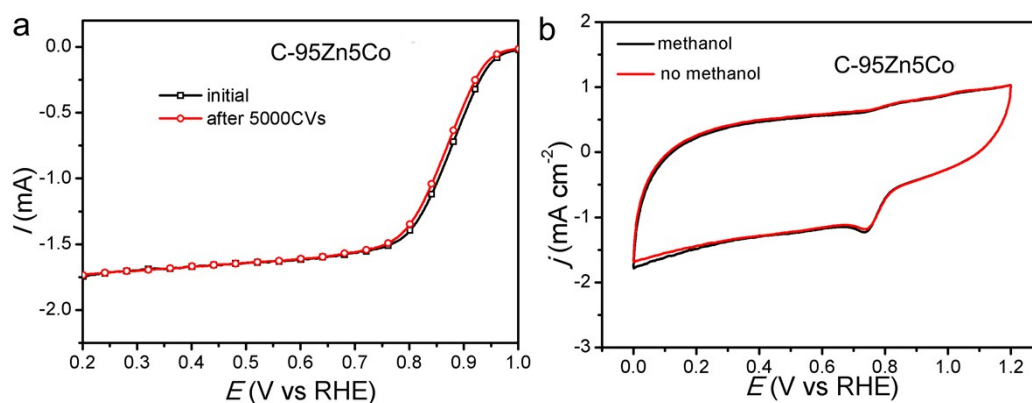

Figure S2. (a) Polarization curves of the C-95Zn5Co sample before and after 5000 cycles in 0.1 M KOH. Potential cycling was carried out between 0.4 to 1.0 V (vs. RHE). (b) Cyclic voltammograms of the C-95Zn5Co sample in 0.1 M KOH with and without 3 M methanol.

**Table S2** A comparison with the state of the art noble metal free ORR catalysts based on Co and N-containing carbons in 0.1 M KOH reported recently and our work.

| Materials                                               | Onset potential<br>(V vs. RHE) | Half-wave<br>potential<br>(V vs. RHE) | Ref |
|---------------------------------------------------------|--------------------------------|---------------------------------------|-----|
| Co <sub>3</sub> O <sub>4</sub> Nanocrystals on Graphene | 0.88                           | 0.83                                  | 1   |
| Triangular Trinuclear Co-N <sub>4</sub> Complexes       | 0.82                           | 0.64                                  | 2   |
| Co-containing N-doped carbon                            | 0.85                           | 0.80                                  | 3   |
| Cobalt and nitrogen-cofunctionalized<br>graphene        | 0.86                           | 0.82                                  | 4   |
| Graphene-based non-noble-metal Co/N/C                   | 0.85                           | 0.81                                  | 5   |

|                                                                        |      |      |           |
|------------------------------------------------------------------------|------|------|-----------|
| catalyst                                                               |      |      |           |
| Co/Co <sub>3</sub> O <sub>4</sub> /C-N                                 | 0.88 | 0.67 | 6         |
| Co-N-co-embedded onion-like mesoporous carbon vesicles                 | 0.83 | 0.78 | 7         |
| Co <sub>3</sub> O <sub>4</sub> Decorated Blood Derived Carbon          | 0.88 | 0.83 | 8         |
| Co <sub>3</sub> O <sub>4</sub> @N doped carbon                         | 0.95 | 0.70 | 9         |
| Co@Co <sub>3</sub> O <sub>4</sub> @C on a ordered porous carbon matrix | 0.93 | 0.81 | 10        |
| N-doped graphene-supported cobalt carbonitride@oxide nanoparticles     | 0.88 | 0.83 | 11        |
| C-95Zn5Co                                                              | 0.96 | 0.89 | This work |
| C-99Zn1Co                                                              | 0.96 | 0.90 | This work |

\*Onset potential is obtained by the intersection of the tangents at the halfwave potential and the baseline in our work.

## References

1. Y. Liang, Y. Li, H. Wang, J. Zhou, J. Wang, T. Regier and H. Dai, *Nature Mater.*, 2011, **10**, 780-786.
2. R. Liu, C. von Malotki, L. Arnold, N. Koshino, H. Higashimura, M. Baumgarten and K. Muellen, *J. Am. Chem. Soc.*, 2011, **133**, 10372-10375.
3. H. Jiang, Y. Su, Y. Zhu, J. Shen, X. Yang, Q. Feng and C. Li, *J. Mater. Chem. A*, 2013, **1**, 12074-12081.
4. S. Jiang, C. Zhu and S. Dong, *J. Mater. Chem. A*, 2013, **1**, 3593-3599.
5. K. Niu, B. Yang, J. Cui, J. Jin, X. Fu, Q. Zhao and J. Zhang, *J. Power Sources*, 2013, **243**, 65-71.
6. Z.-Y. Wu, P. Chen, Q.-S. Wu, L.-F. Yang, Z. Pan and Q. Wang, *Nano Energy*, 2014, **8**, 118-125.
7. M. Li, X. Bo, Y. Zhang, C. Han, A. Nsabimana and L. Guo, *J. Mater. Chem. A*, 2014, **2**, 11672-11682.
8. C. Zhang, M. Antonietti and T.-P. Fellingner, *Adv. Funct. Mater.*, 2014, **24**, 7655-7665.
9. G. Zhang, C. Li, J. Liu, L. Zhou, R. Liu, X. Han, H. Huang, H. Hu, Y. Liu and Z. Kang, *J. Mater.*

*Chem. A*, 2014, **2**, 8184-8189.

10. W. Xia, R. Zou, L. An, D. Xia and S. Guo, *Energy Environ. Sci.*, 2015, DOI: 10.1039/C4EE02281E.
11. Y. Wu, Q. Shi, Y. Li, Z. Lai, H. Yu, H. Wang and F. Peng, *J. Mater. Chem. A*, 2015, **3**, 1142-1151.
